# Supplementary material for: Synthesis, Computational Insights, and Evaluation of Novel Sigma Receptors Ligands
Source: PubMed Central journal article supplement (PMC10197133; doi:10.1021/acschemneuro.3c00074), 2023-05-08

## Supporting Information

### Synthesis, computational insights, and evaluation of novel sigma receptors ligands

Maria Dichiara,<sup>1</sup> Francesca Alessandra Ambrosio,<sup>2</sup> Carla Barbaraci,<sup>1</sup> Rafael González-Cano,<sup>3</sup> Giosuè Costa,<sup>4,5</sup> Carmela Parenti,<sup>1</sup> Agostino Marrazzo,<sup>1</sup> Lorella Pasquinucci,<sup>1</sup> Enrique J. Cobos,<sup>3</sup> Stefano Alcaro,<sup>4,5,\*</sup> Emanuele Amata<sup>1,\*</sup>

<sup>1</sup>Dipartimento di Scienze del Farmaco e della Salute, Università degli Studi di Catania, Viale Andrea Doria 6, 95125, Catania, Italy;

<sup>2</sup>Dipartimento di Medicina Sperimentale e Clinica, Università degli Studi “Magna Græcia” di Catanzaro, Campus “S. Venuta”, Viale Europa, 88100, Catanzaro, Italy;

<sup>3</sup>Departamento de Farmacología e Instituto de Neurociencias, Facultad de Medicina, Universidad de Granada e Instituto de Investigación Biosanitaria de Granada ibs.GRANADA, Avenida de la Investigación, 11 18016 Granada, Spain;

<sup>4</sup>Dipartimento di Scienze della Salute, Università “Magna Græcia” di Catanzaro, Campus “S. Venuta”, 88100, Catanzaro, Italy;

<sup>5</sup>Net4Science Academic Spin-Off, Università “Magna Græcia” di Catanzaro, Campus “S. Venuta”, 88100, Catanzaro, Italy.

#### Corresponding Author

\*Emanuele Amata: phone, (+39) 0957384102; email, [eamata@unict.it](mailto:eamata@unict.it)

\*Stefano Alcaro: phone, (+39) 09613694198; email, [alcaro@unicz.it](mailto:alcaro@unicz.it)

# $^1\text{H}$ and $^{13}\text{C}$ NMR-spectra in $\text{CDCl}_3$

2-Phenethyl-7-phenyl-2,7-diazaspiro[3.5]nonane (**AD172**, **4a**)

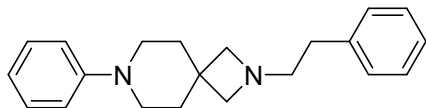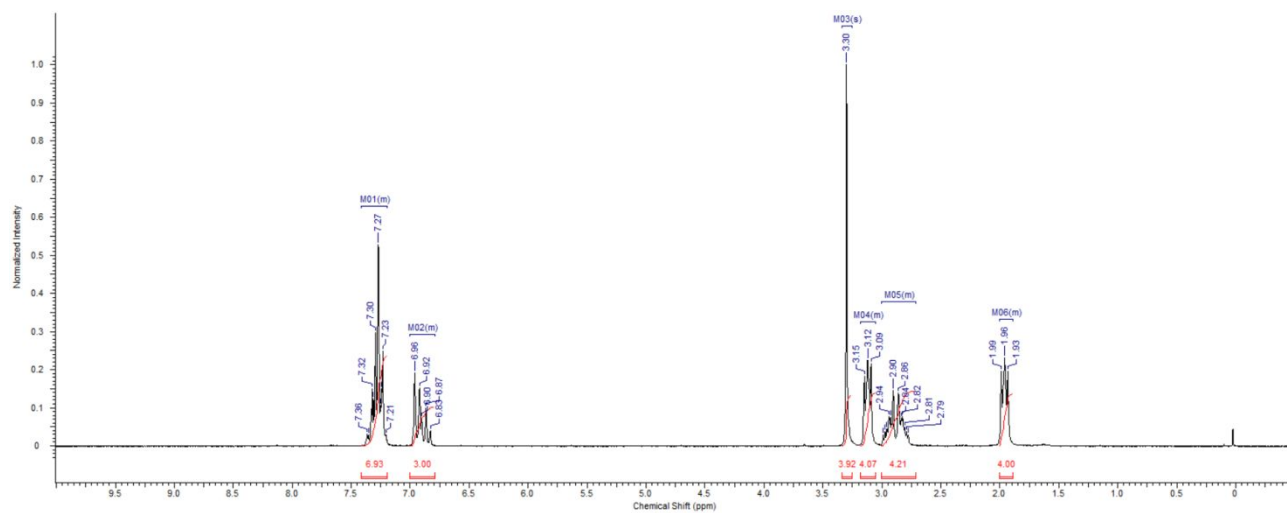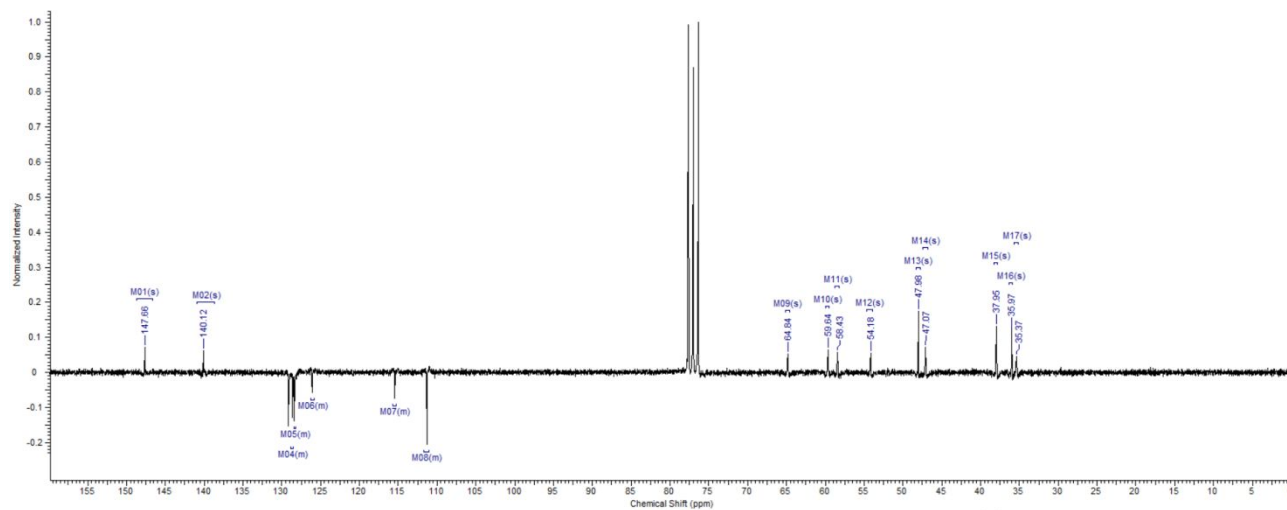

7-Benzyl-2-phenethyl-2,7-diazaspiro[3.5]nonane (**AD186**, **4b**)

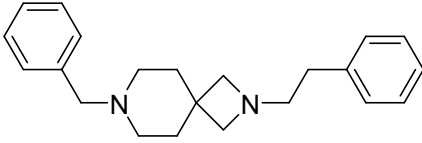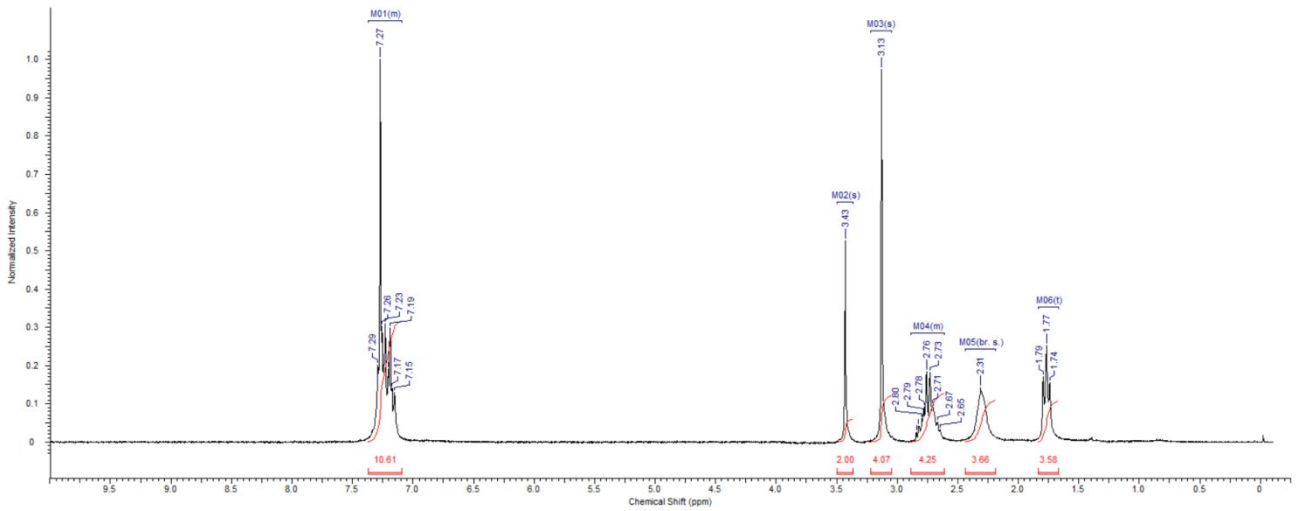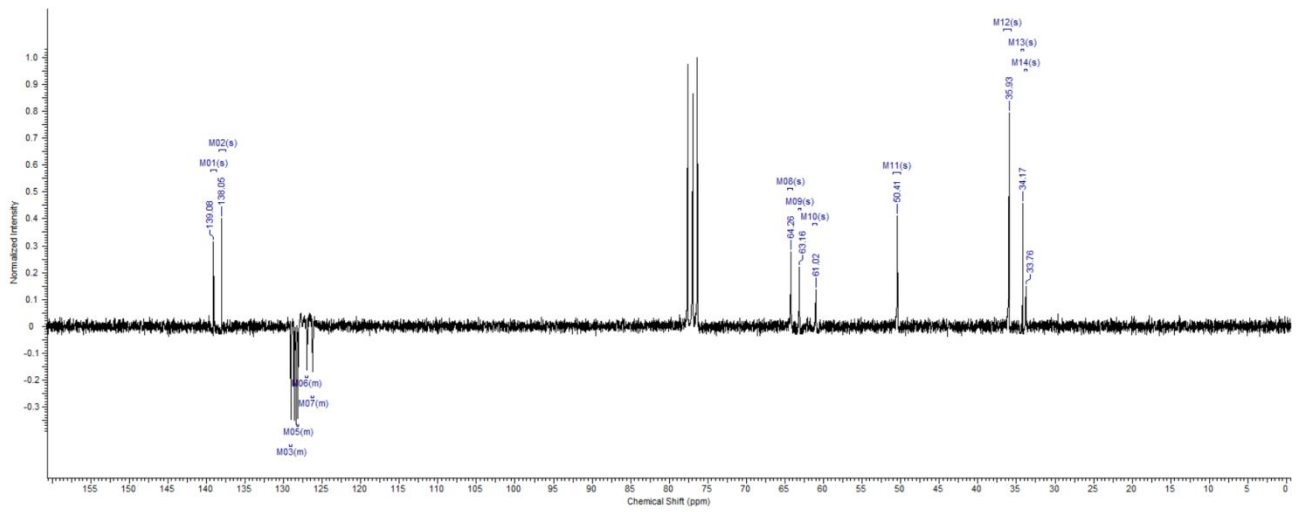

# 2,7-Diphenethyl-2,7-diazaspiro[3.5]nonane (AD187, 4c)

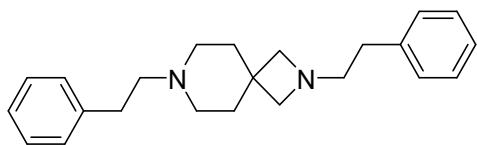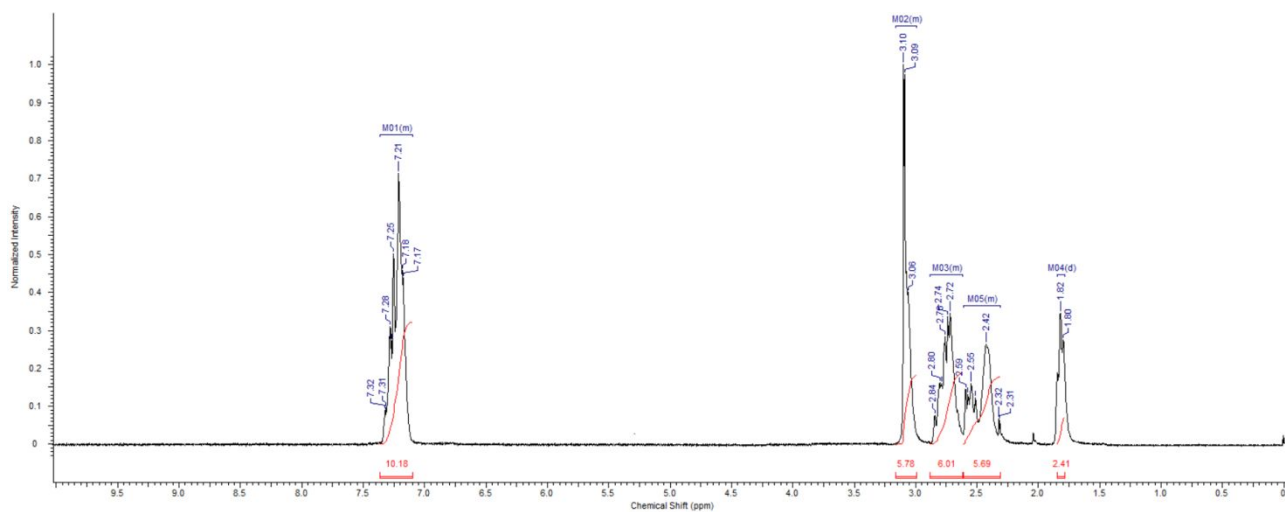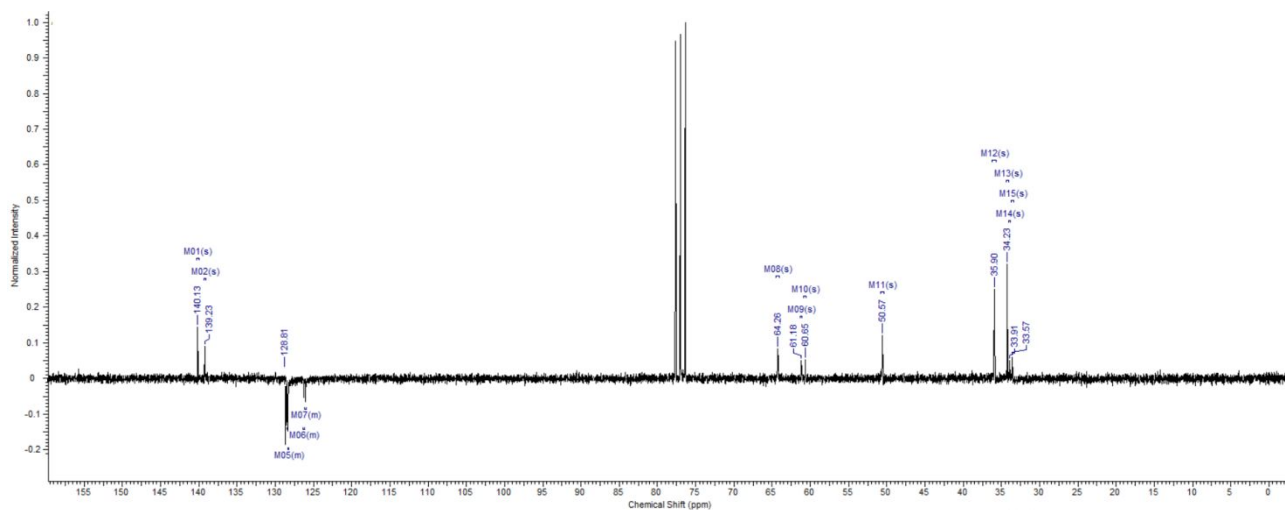

7-Phenyl-2-(3-phenylpropyl)-2,7-diazaspiro[3.5]nonane (**AD173**, **4d**)

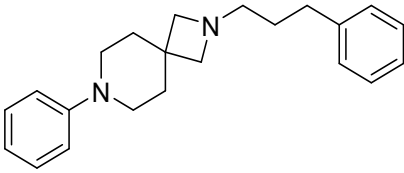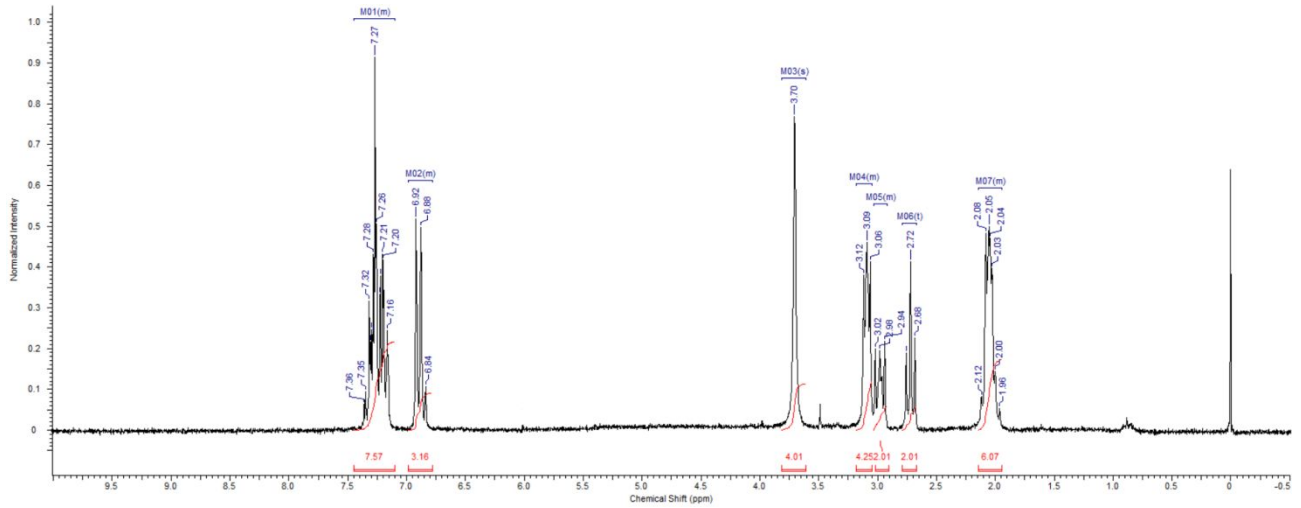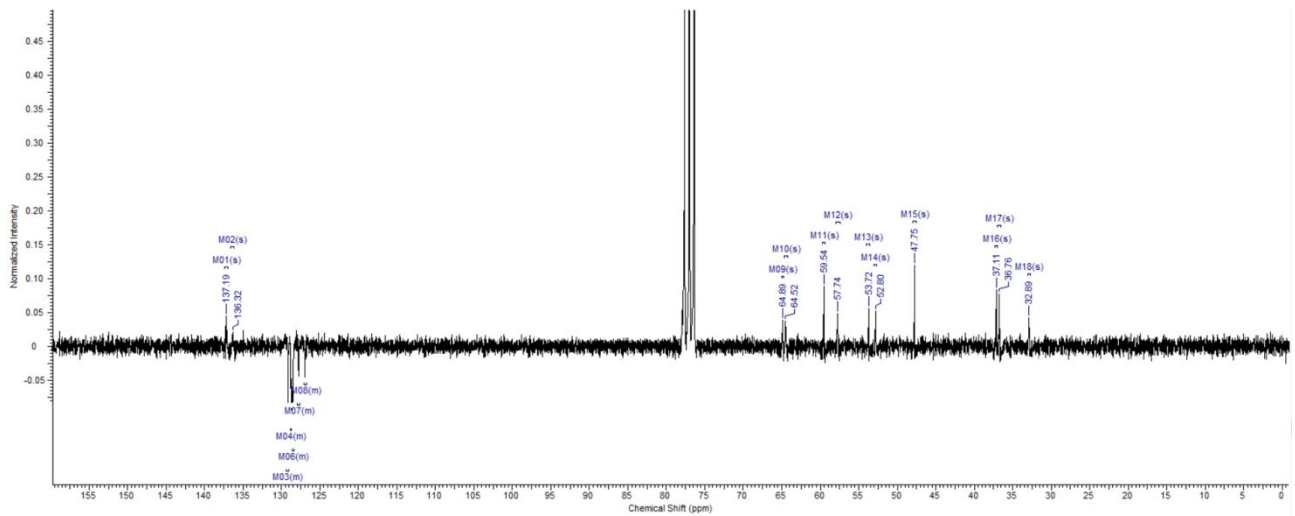

7-Benzyl-2-(3-phenylpropyl)-2,7-diazaspiro[3.5]nonane (**AD195**, **4e**)

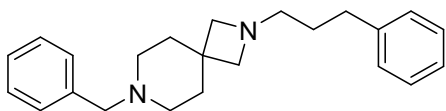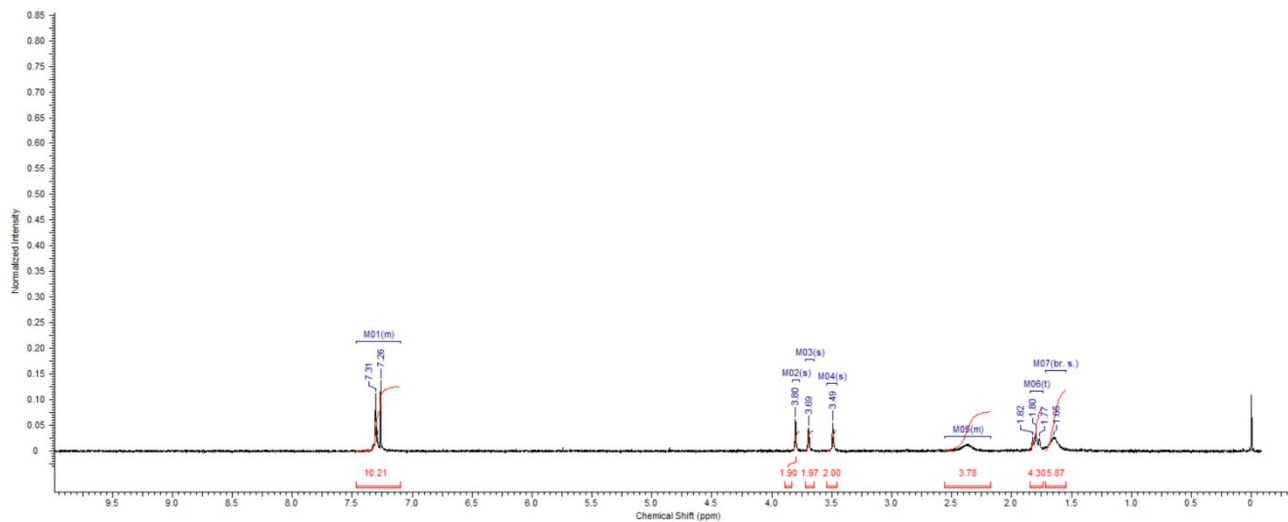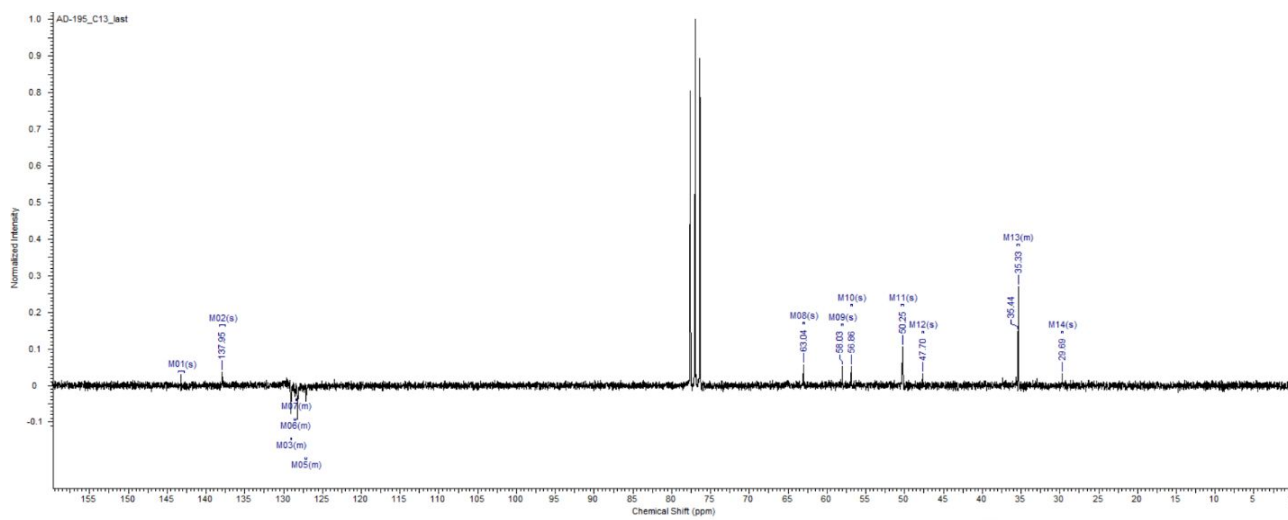

7-Phenethyl-2-(3-phenylpropyl)-2,7-diazaspiro[3.5]nonane (**AD197**, **4f**)

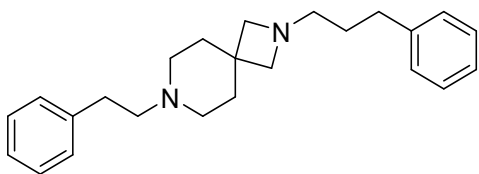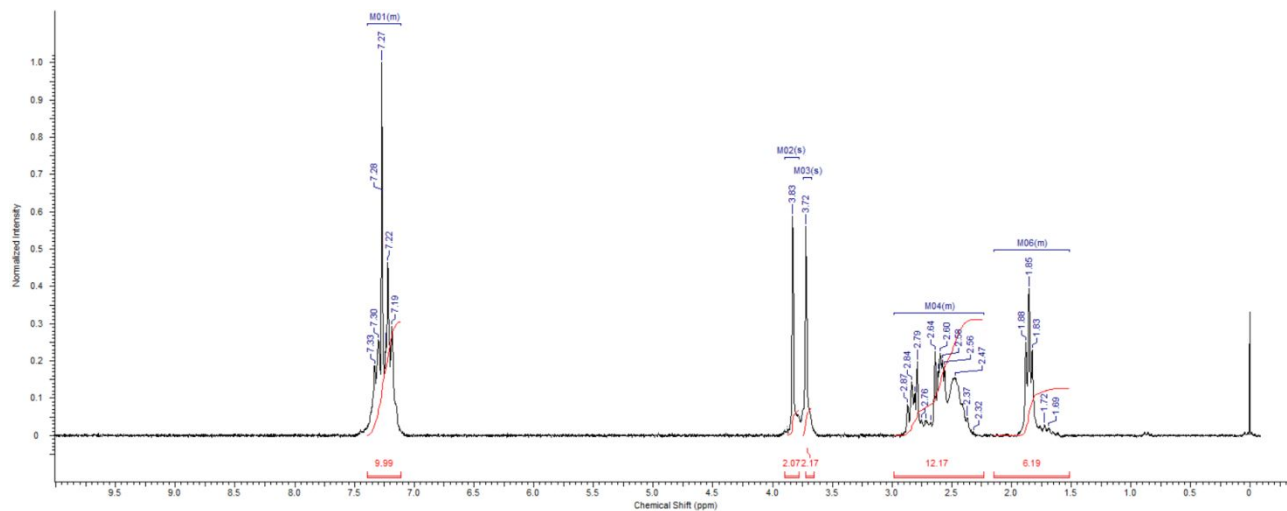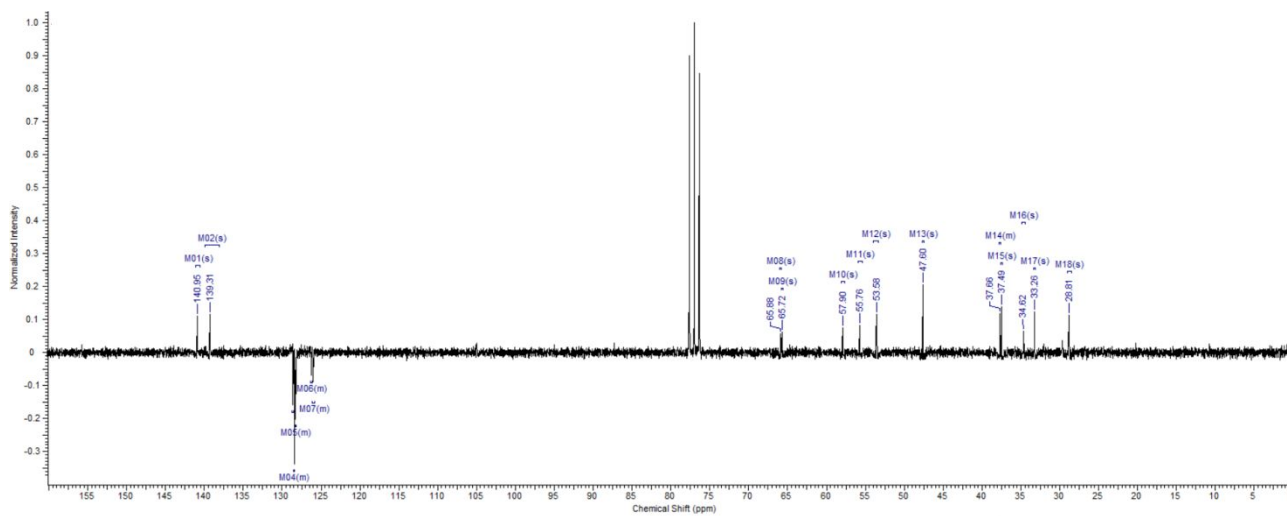

(2-Phenethyl-2,7-diazaspiro[3.5]nonan-7-yl)(phenyl)methanone (**AB19, 5a**)

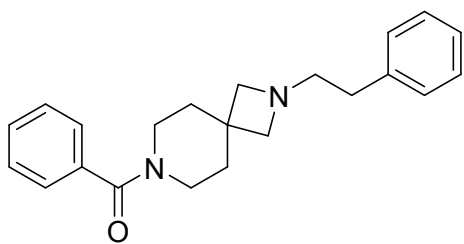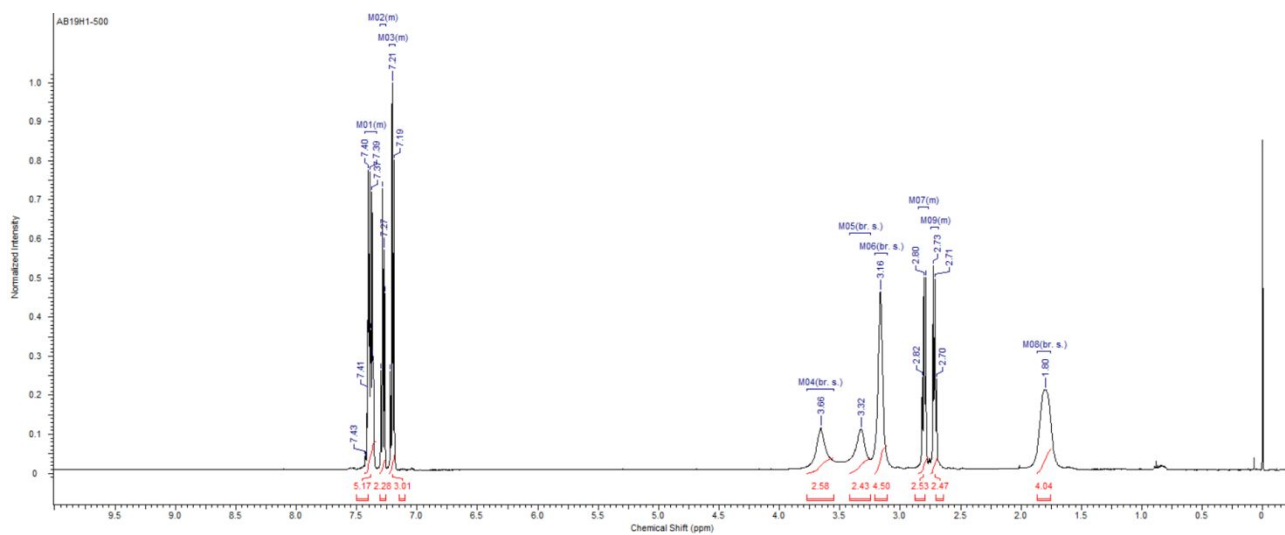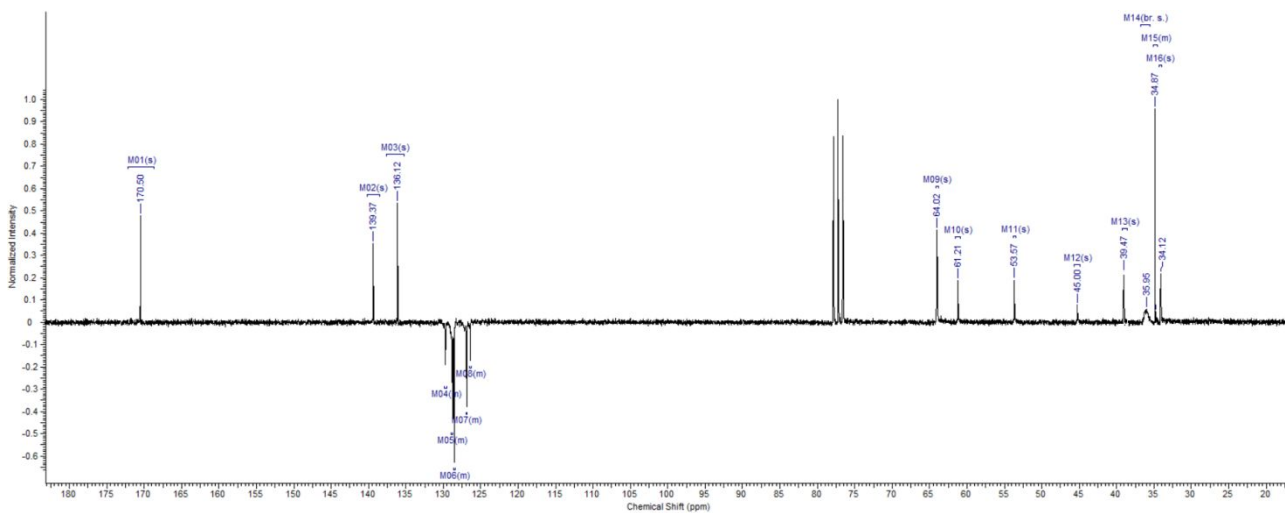



# 1-(2-Phenethyl-2,7-diazaspiro[3.5]nonan-7-yl)-2-phenylethan-1-one (AB21, 5b)

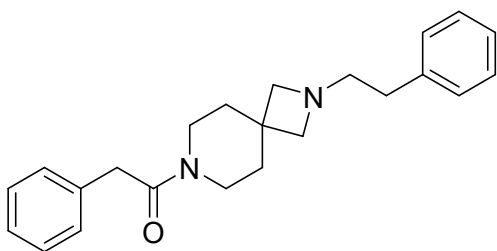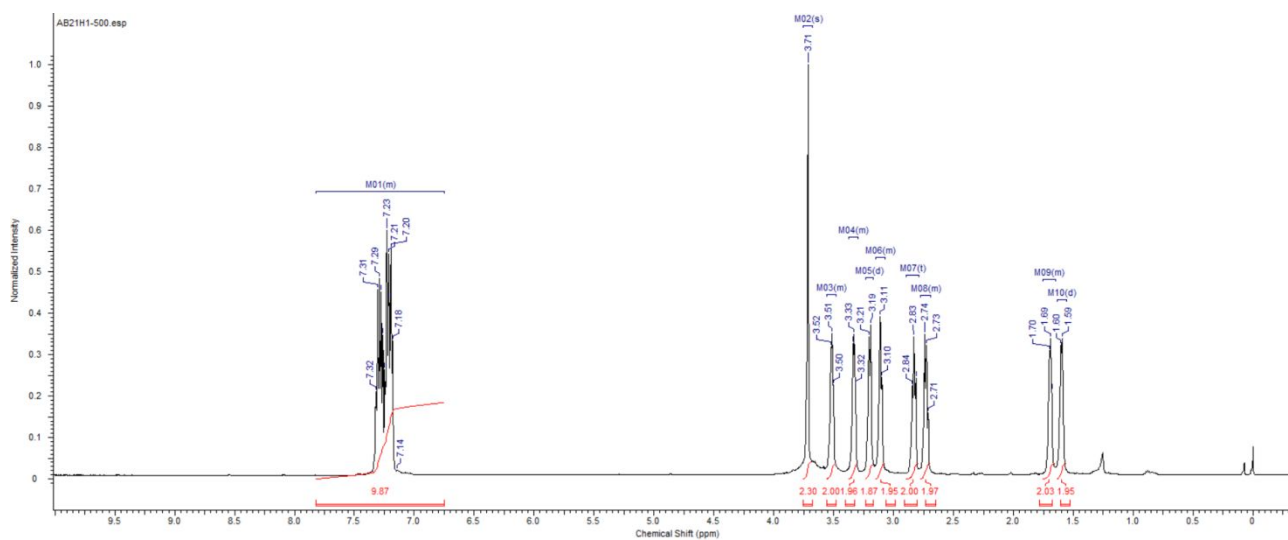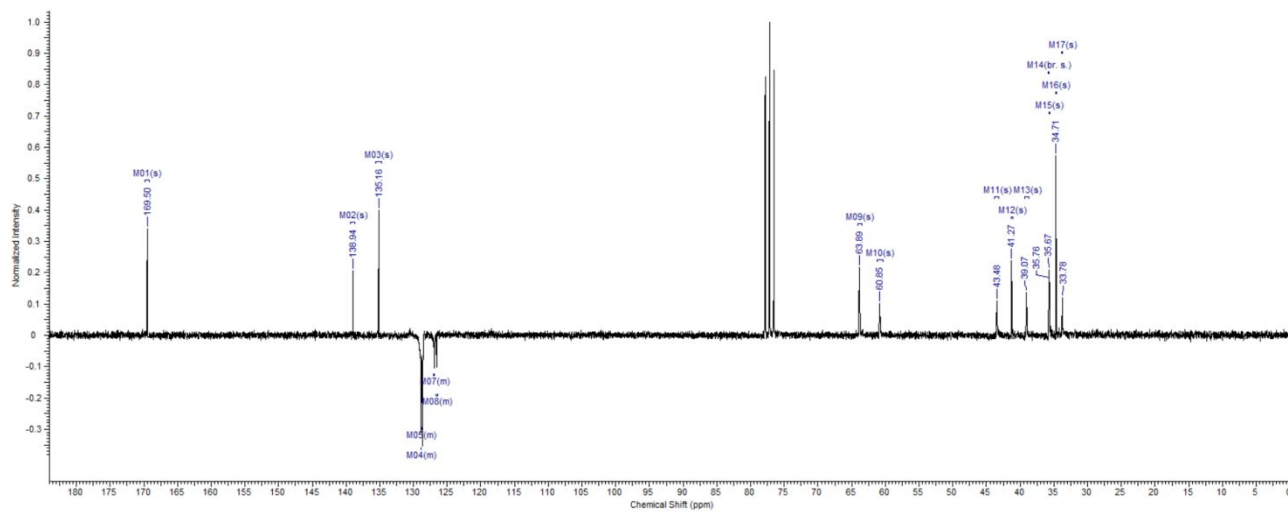

# 1-Benzyl-6-phenyloctahydro-1*H*-pyrrolo[3,4-*b*]pyridine (AD260, 8a)

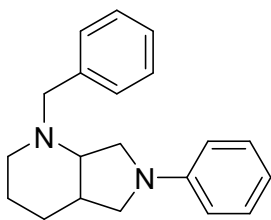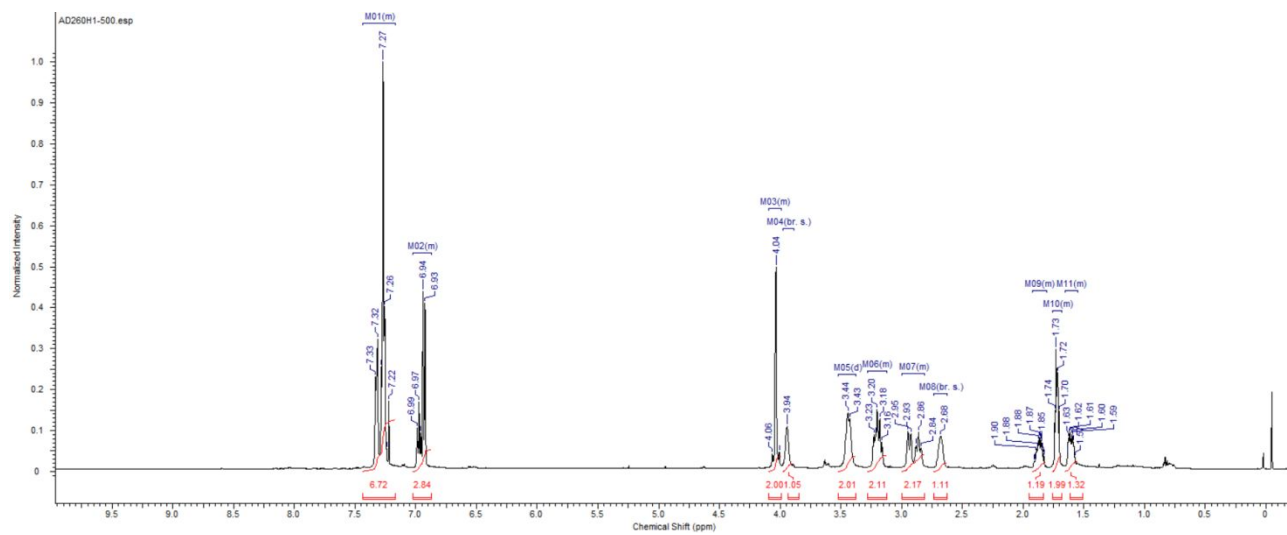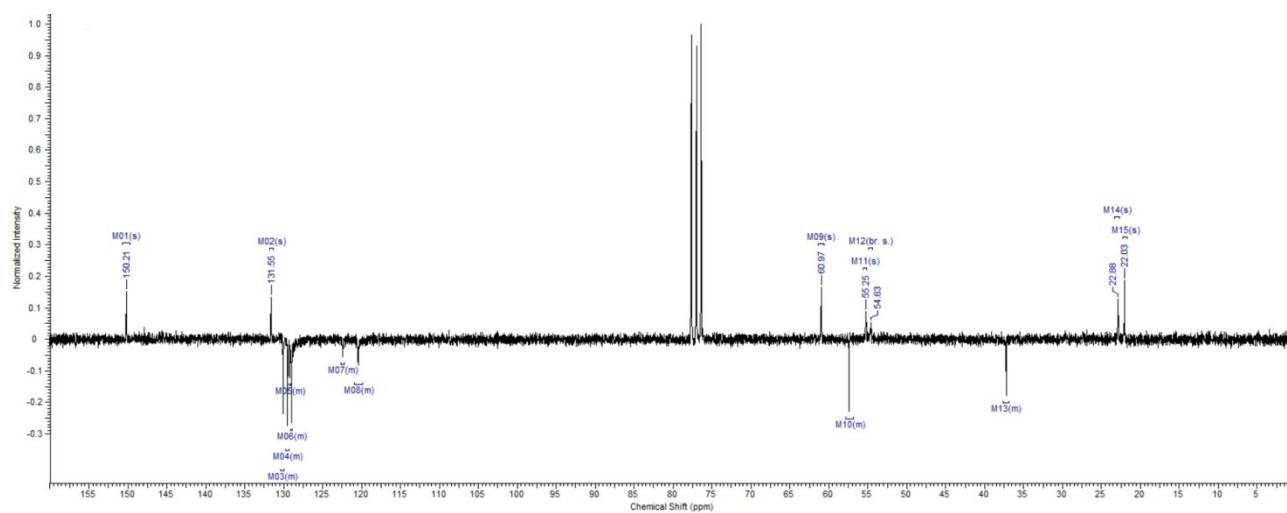

# 1-Phenethyl-6-phenyloctahydro-1*H*-pyrrolo[3,4-*b*]pyridine (AB13, 8b)

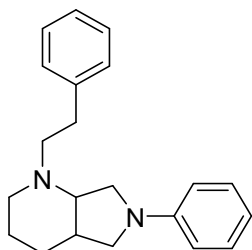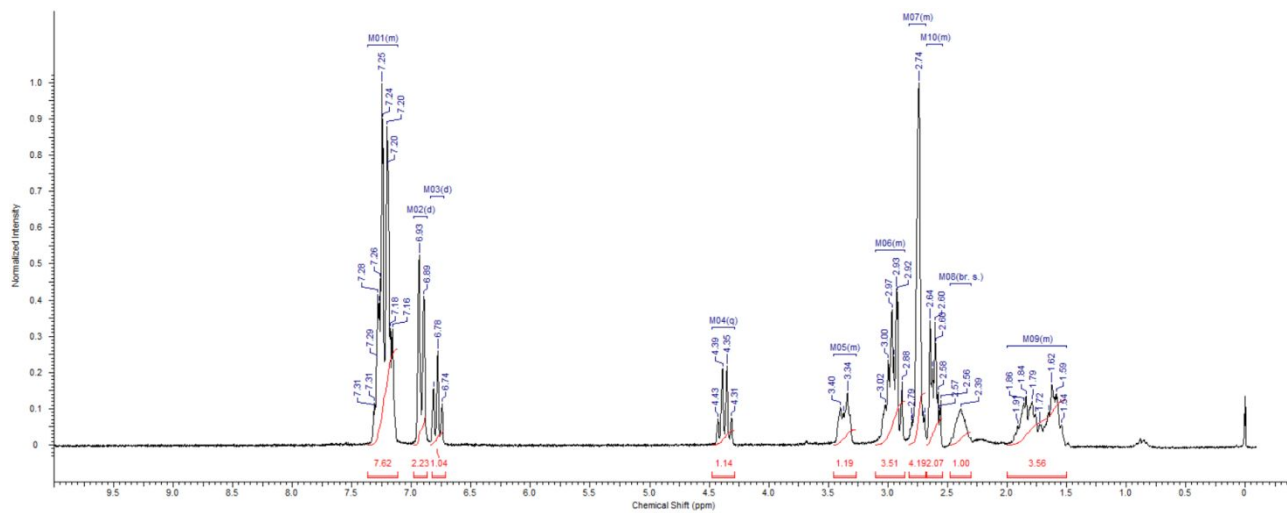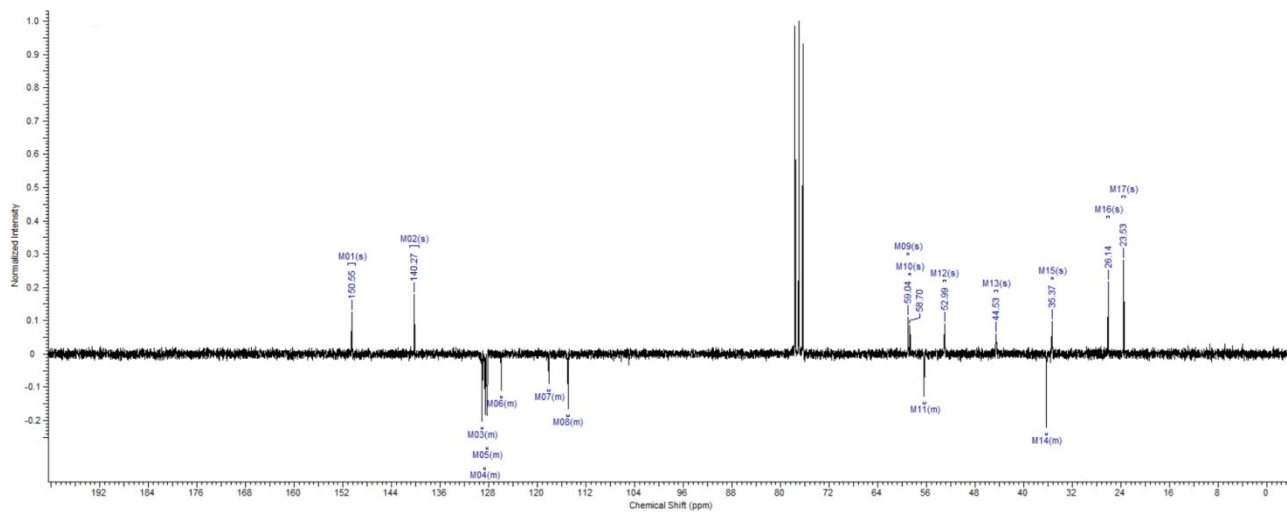

6-Benzyl-1-phenethyloctahydro-1H-pyrrolo[3,4-b]pyridine (AB9, 8c)

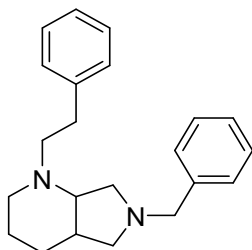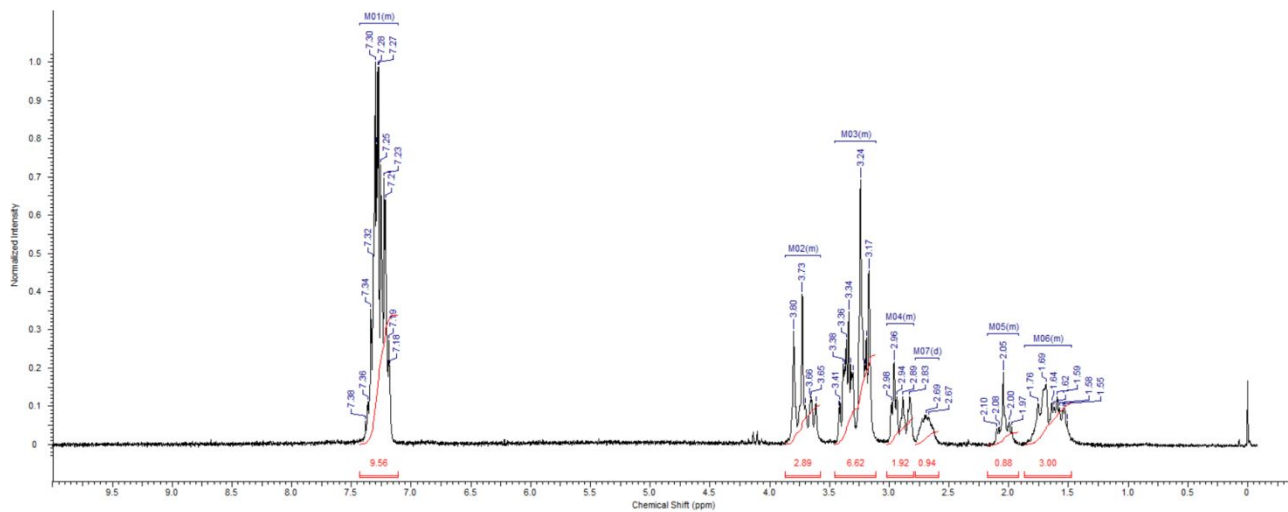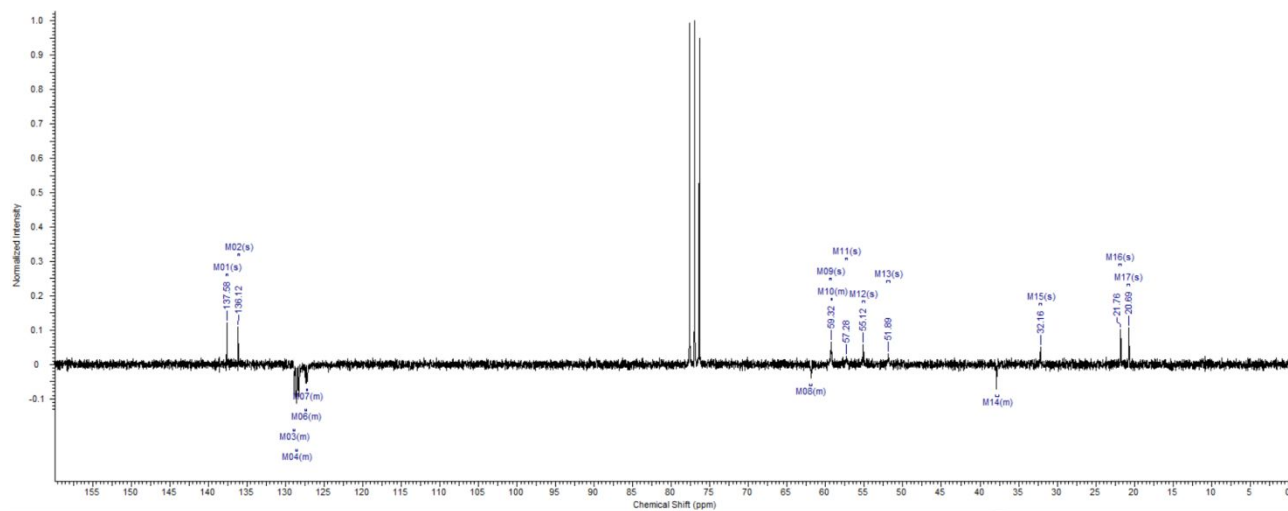

1,6-Diphenethyloctahydro-1*H*-pyrrolo[3,4-*b*]pyridine (**AB7**, **8d**)

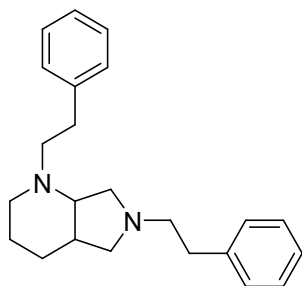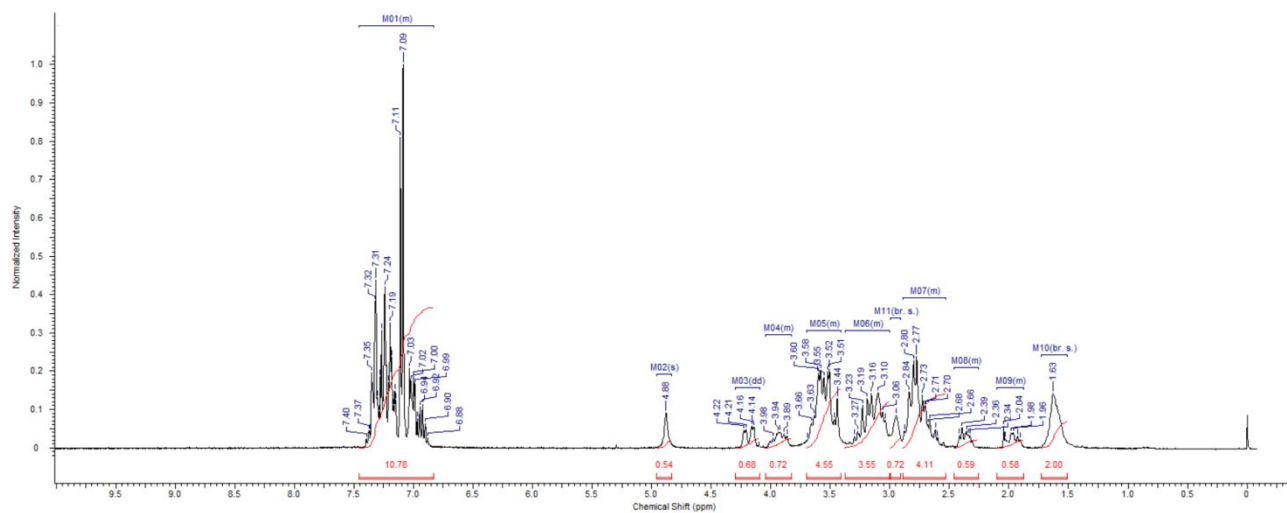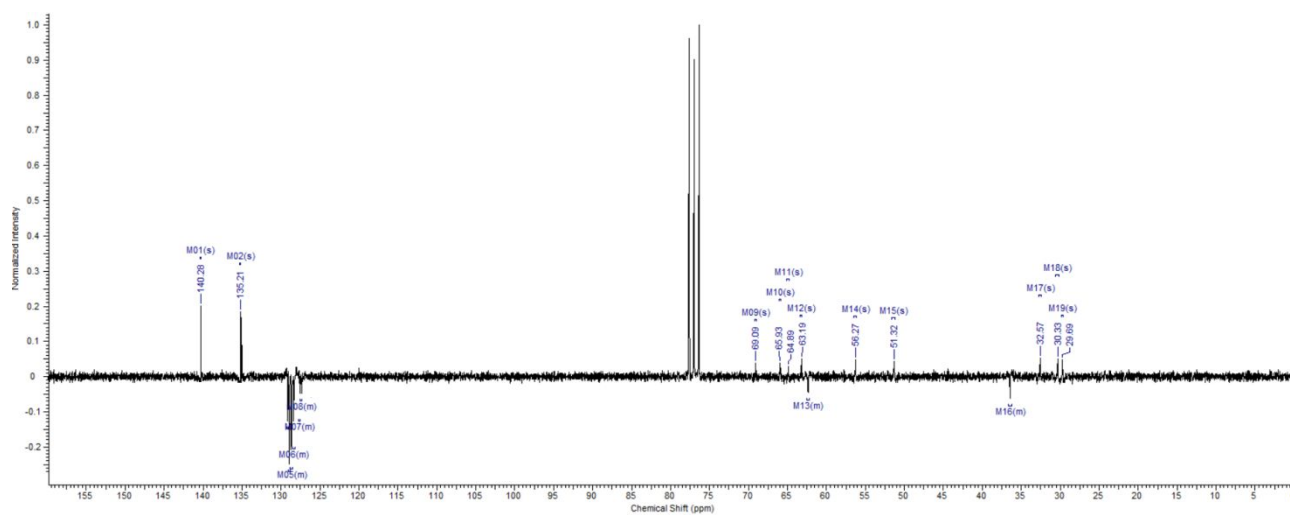

6-Phenyl-1-(3-phenylpropyl)octahydro-1*H*-pyrrolo[3,4-*b*]pyridine (AB14, 8e)

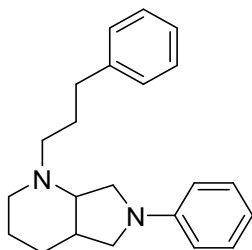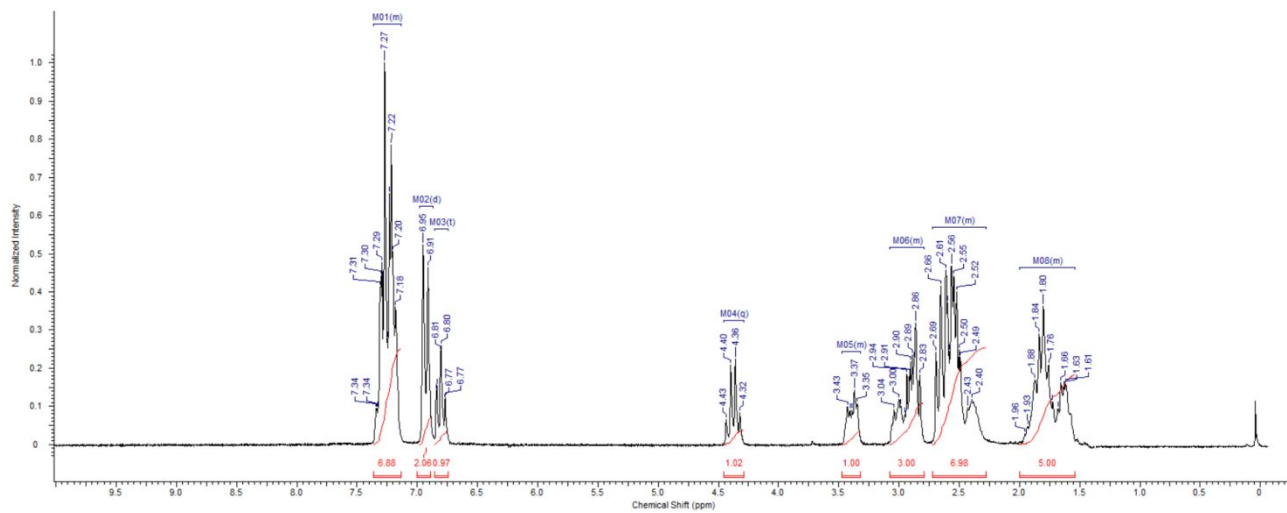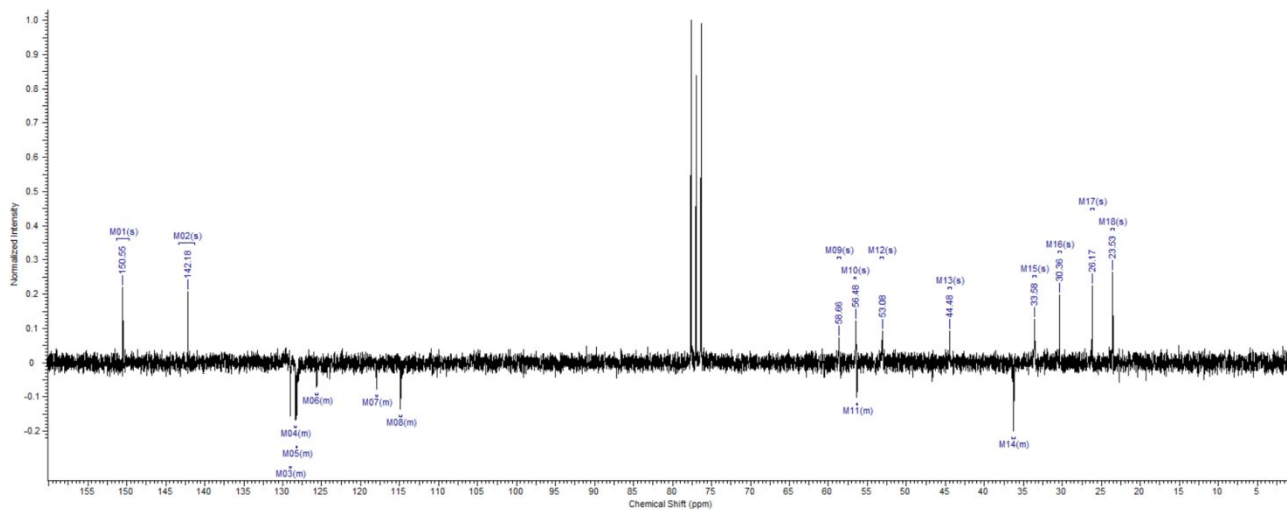

6-Benzyl-1-(3-phenylpropyl)octahydro-1*H*-pyrrolo[3,4-*b*]pyridine (AB10, 8f)

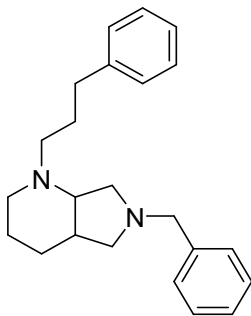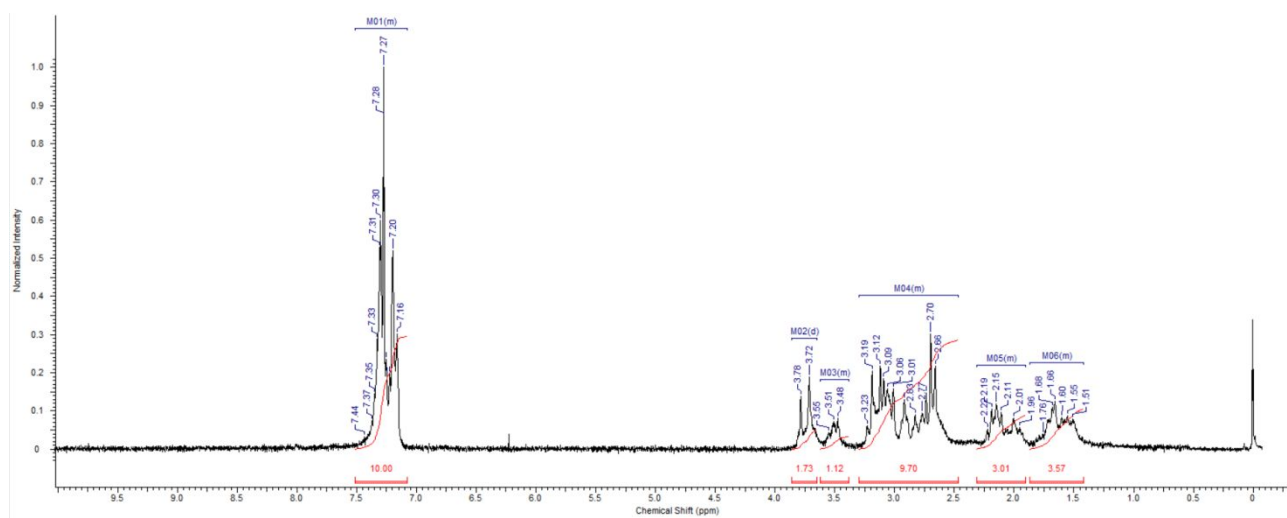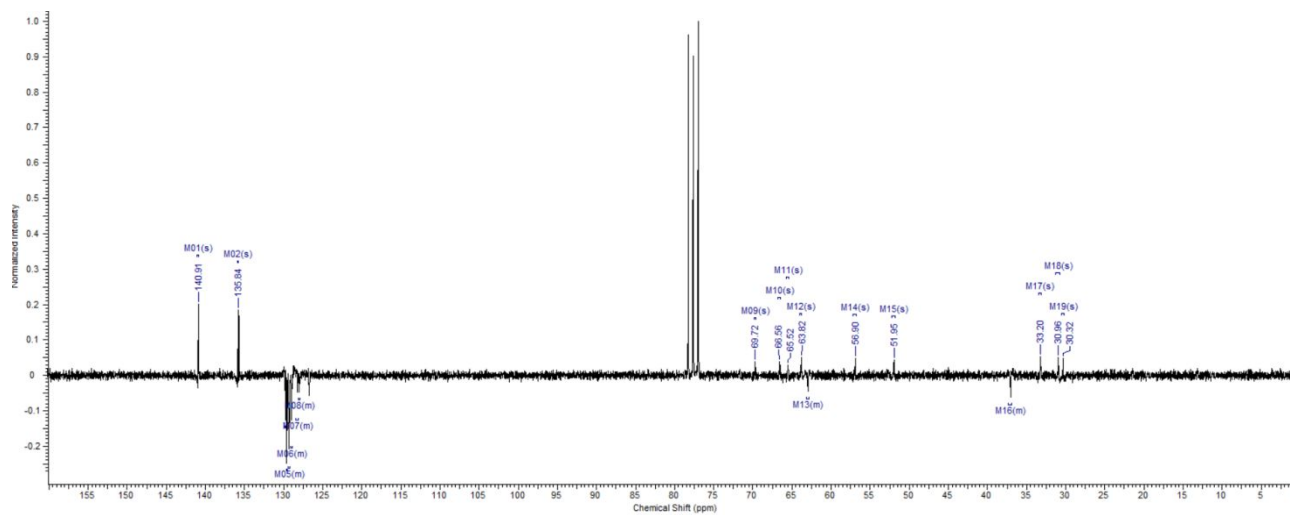

# 6-Phenethyl-1-(3-phenylpropyl)octahydro-1*H*-pyrrolo[3,4-*b*]pyridine (AB8, 8g)

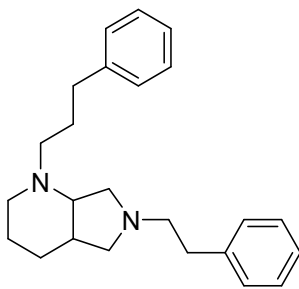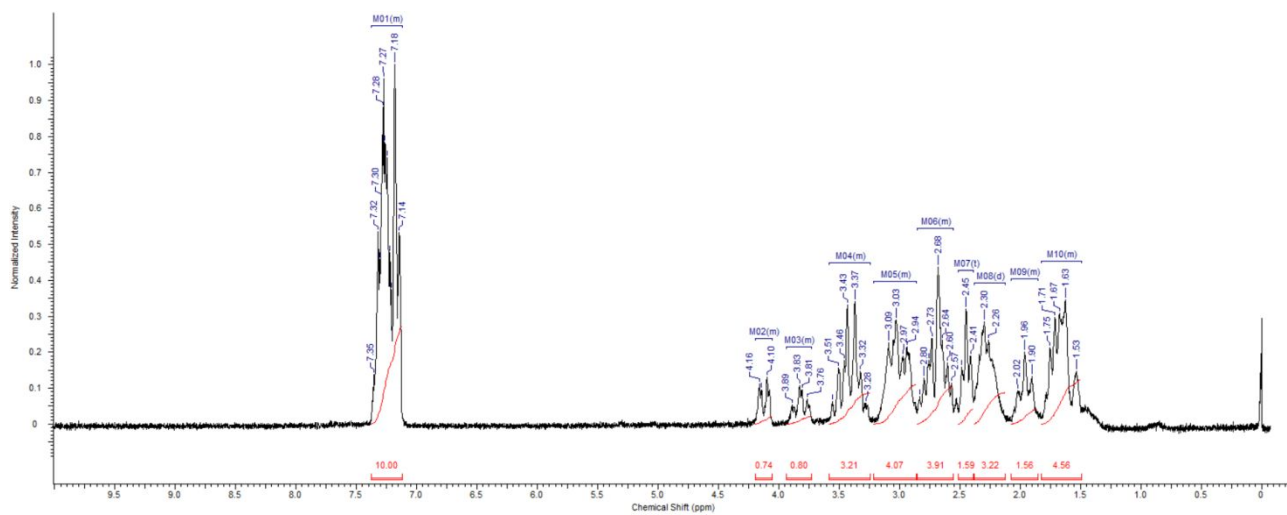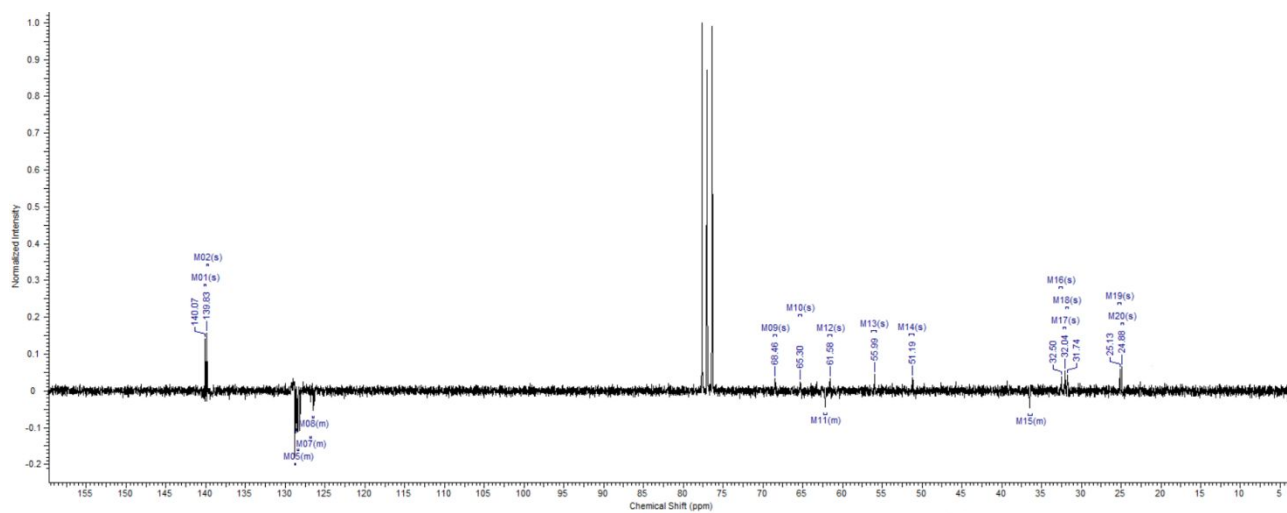

Supplement: cn3c00074_si_001.pdf [file cn3c00074_si_001.pdf]
